# Supplementary material for: Diagnosis of Depth of Submucosal Invasion in Colorectal Cancer with AI Using Deep Learning
Source: MDPI journal article supplement (doi:10.3390/cancers14215361), 2022-10-31
Supplement: s1 [file s1]

**Supplementary Table S1.** Clinicopathological features and statistical analysis between learning and validation sets.

| Variables                                                   | Learning set (2011-2015) | Validation set (2016-2017) | P-Value |
|-------------------------------------------------------------|--------------------------|----------------------------|---------|
|                                                             | <i>n</i> = 91            | <i>n</i> = 49              |         |
| Age, median (years) *                                       | 66 (41–86)               | 66 (35–84)                 | 0.740   |
| Sex (male/female)                                           | 59/32                    | 28/21                      | 0.371   |
| Location (colon/rectum)                                     | 54/37                    | 32/17                      | 0.489   |
| Greatest diameter, median (mm)                              | 20 (0–50)                | 20 (6–66)                  | 0.703   |
| Preoperative CEA ( $\geq 5/5 < \text{NA}$ )<br>(ng/mL)      | 12/78/1                  | 11/36/2                    | 0.362   |
| Preoperative CA19-9 ( $\geq 38/38 < \text{NA}$ )<br>(ng/mL) | 5/85/1                   | 3/44/2                     | 0.845   |
| Degree of differentiation<br>(tub1/tub2/others)             | 57/30/4                  | 29/19/1                    | 0.474   |
| Depth of invasion, median ( $\mu\text{m}$ ) *               | 2000 (0–9000)            | 2200 (91–12000)            | 0.324   |
| Lymph node metastasis (+/-)                                 | 7/84                     | 7/42                       | 0.215   |
| Lymphatic invasion (+/-)                                    | 24/67                    | 16/33                      | 0.433   |
| Vascular invasion (+/-)                                     | 12/79                    | 7/42                       | 0.856   |
| Budding grade (1/2, 3/NA)                                   | 54/16/21                 | 37/8/4                     | 0.513   |

\* Continuous variables were evaluated.

CEA, Carcinoembryonic antigen; CA19-9, Carbohydrate antigen 19-9; NA, Not applicable

**Supplementary Table S2.** The percentage of endoscopic images with incorrect AI diagnosis in the validation set.

|                                |           | AI diagnosis |            |
|--------------------------------|-----------|--------------|------------|
|                                |           | Tumor area   | Other area |
| Pathological<br>classification | SM-s      | 28 images    | 36 images  |
|                                | 64 images | (43.8%)      | (56.2%)    |
|                                | SM-d      | 15 images    | 23 images  |
|                                | 38 images | (39.5%)      | (60.5%)    |
